# Supplementary material
Source: MDPI journal article supplement (https://www.mdpi.com/2076-3417/13/6/3734)

## Supporting information for:

### Does the monomer sequence influence the thermal behavior of poly(acrylonitrile-co-acrylamide)?

Roman V. Toms <sup>1</sup>, Mikhail S. Balashov <sup>1</sup>, Alexander Yu. Gervald <sup>1</sup>, Nikolay I. Prokopov <sup>1</sup>,  
Anna V. Plutalova <sup>2</sup>, and Elena V. Chernikova <sup>2\*</sup>

<sup>1</sup> MIREA—Russian Technological University, Institute of Fine Chemical Technologies named by  
M.V. Lomonosov, Moscow, 119571 Russia; toms.roman@gmail.com; diplomglue@gmail.com;  
gervald@bk.ru; prokopov@mirea.ru

<sup>2</sup> Lomonosov Moscow State University, Faculty of Chemistry, Leninskie Gory 1, bld. 3, 119991,  
Moscow, Russia; annaplutalova@gmail.com; chernikova\_elena@mail.ru

\* Correspondence: chernikova\_elena@mail.ru

## Table of Contents

|                                                                                                                                                                                               |   |
|-----------------------------------------------------------------------------------------------------------------------------------------------------------------------------------------------|---|
| <b>Table S1.</b> Formulations of the RAFT copolymerization of AN and AAM.....                                                                                                                 | 2 |
| <b>Figure S1.</b> Calibration curve for determination copolymer composition. ....                                                                                                             | 3 |
| <b>Figure S2.</b> <sup>1</sup> H NMR spectra of copolymers 5 (a), 6(b), 7 (b) and <sup>13</sup> C NMR spectrum of copolymer<br>7 (d) in DMSO-d <sub>6</sub> solution at room temperature..... | 4 |
| <b>Figure S3.</b> SEC traces of the copolymers formed in the experiments 4 – 7 (Table 1) at various<br>conversions; Samples: 4 (a), 5 (b), 6 (c), and 7 (d).....                              | 6 |
| <b>Figure S4.</b> DCS thermograms of samples 1, 2, 4 – 6 registered in argon at different heating rates                                                                                       | 7 |
| <b>Figure S5.</b> FTIR spectra of AN and AAM copolymers subjected to thermal treatment in Ar<br>atmosphere at 200 °C for 0 (1), 5 (2), 10 (3) 20 (4), 60 (5), and 120 min (6) .....           | 8 |
| <b>Figure S6.</b> FTIR spectra of AN and AAM copolymers subjected to thermal treatment in Ar<br>atmosphere at 225 °C for 0 (1), 7 (2), 30 (3) 60 (4), and 120 min (5) .....                   | 9 |

**Table S1.** Formulations of the RAFT copolymerization of AN and AAM

| Sample | AN   |      | AAM  |      | DMSO, mL | AIBN  |        | BTC    |        | In semi-batch process |        |                     |
|--------|------|------|------|------|----------|-------|--------|--------|--------|-----------------------|--------|---------------------|
|        | g    | mmol | g    | mmol |          | g     | mmol   | g      | mmol   | DMSO, mL              | AAM, g | Addition rate, mL/h |
| 1      | 19.5 | 368  | 0.53 | 7.5  | 27.27    | 0.009 | 0.0548 | 0.0155 | 0.0534 | –                     | –      | –                   |
| 2      | 18.9 | 356  | 1.33 | 18.7 | 27.27    | 0.009 | 0.0548 | 0.0155 | 0.0534 | –                     | –      | –                   |
| 3      | 18.5 | 349  | 1.86 | 26.2 | 27.27    | 0.009 | 0.0548 | 0.0155 | 0.0534 | –                     | –      | –                   |
| 4      | 18.5 | 349  | 1.86 | 26.2 | 27.27    | 0.018 | 0.1096 | 0.031  | 0.1069 | –                     | –      | –                   |
| 5      | 18.5 | 349  |      |      | 27.27    | 0.018 | 0.1096 | 0.031  | 0.1069 | 4.0                   | 4.44   | 4                   |
| 6      | 18.5 | 349  |      |      | 27.27    | 0.018 | 0.1096 | 0.031  | 0.1069 | 2.5                   | 2.77   | 2                   |
| 7      | 18.5 | 349  |      |      | 27.27    | 0.018 | 0.1096 | 0.031  | 0.1069 | 2.5                   | 2.77   | 2                   |

**Figure S1.** Calibration curve for determination copolymer composition.

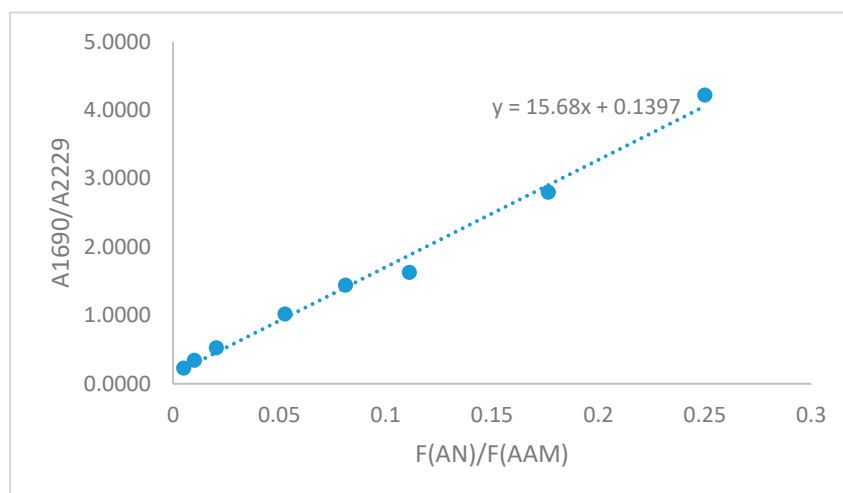

$A_{1690}$  – intensity of the carbonyl absorbance band of amide group,  $A_{2240}$  – intensity of the absorbance band of  $-C\equiv N$  group,  $F_{AAM}$  and  $F_{AN}$  – molar part of AN and AAM in the mixture.

**Figure S2.**  $^1\text{H}$  NMR spectra of copolymers 5 (a), 6(b), 7 (b) and  $^{13}\text{C}$  NMR spectrum of copolymer 7 (d) in DMSO- $d_6$  solution at room temperature

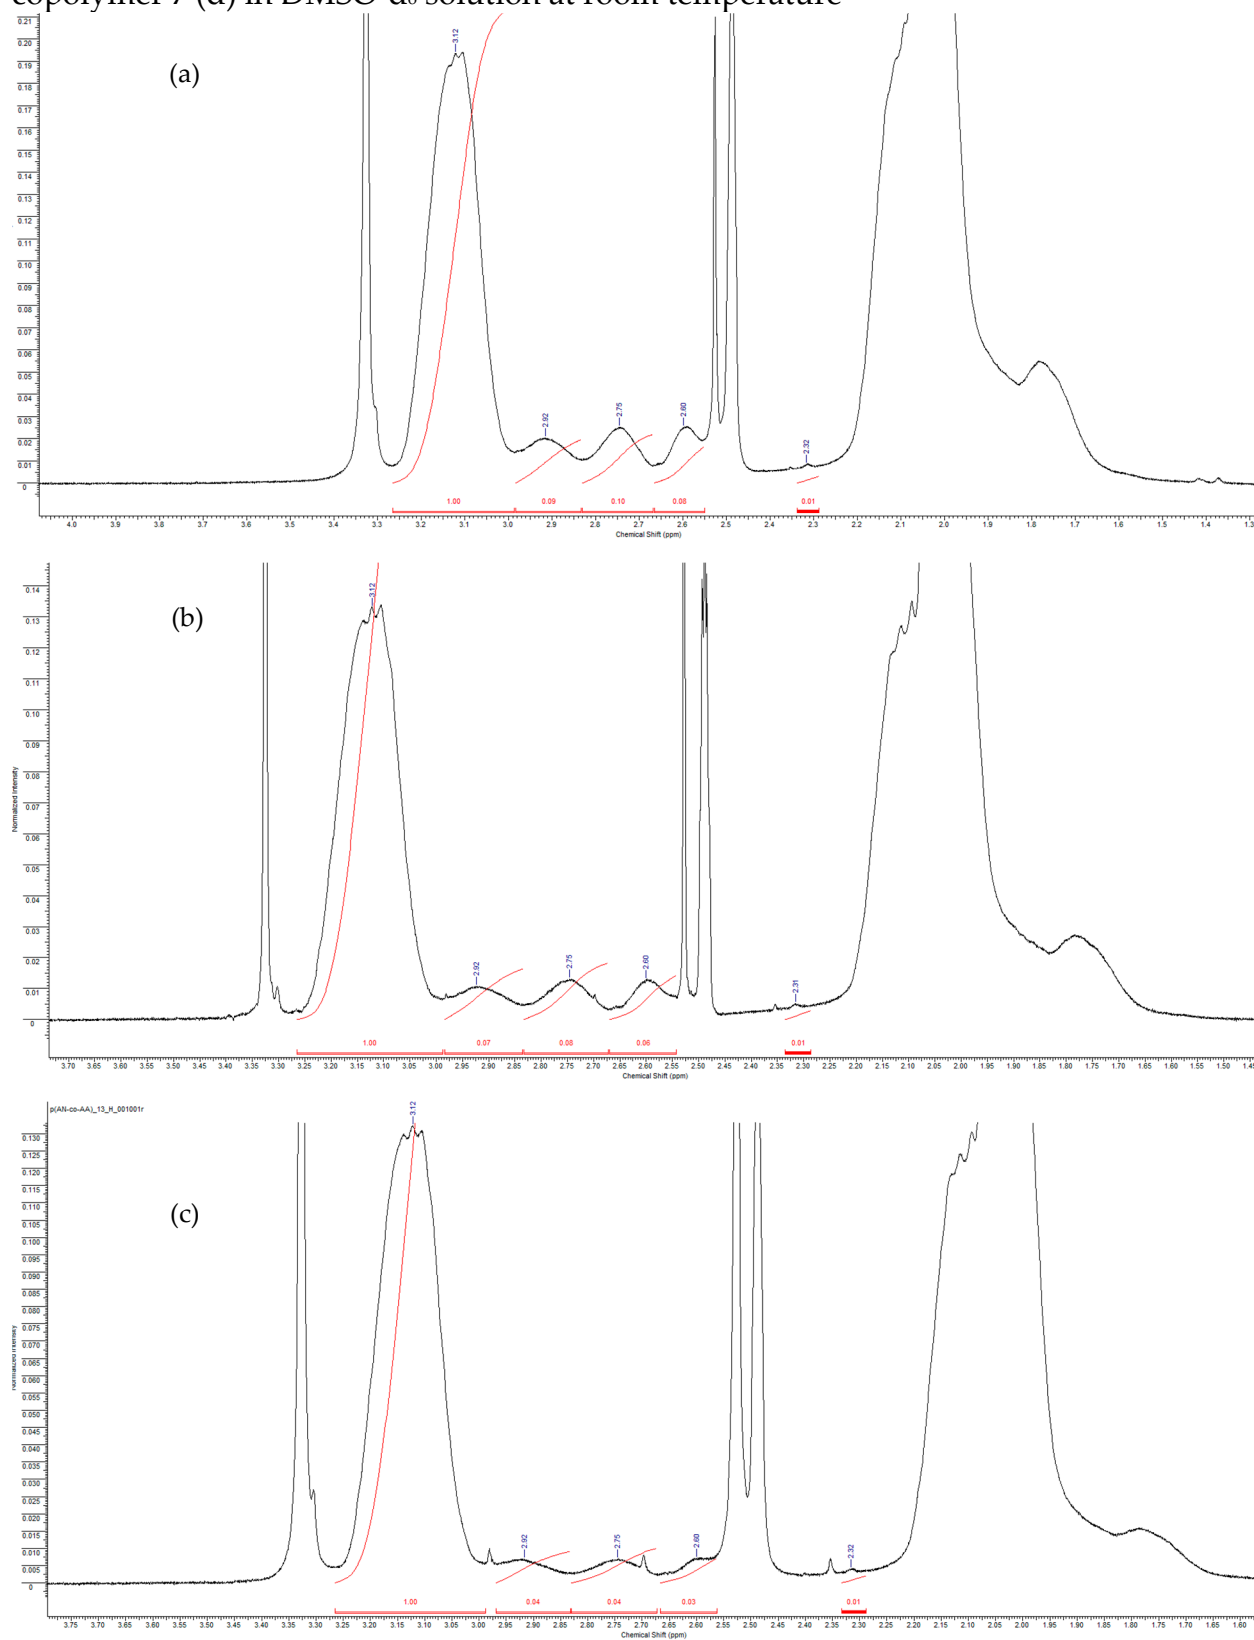

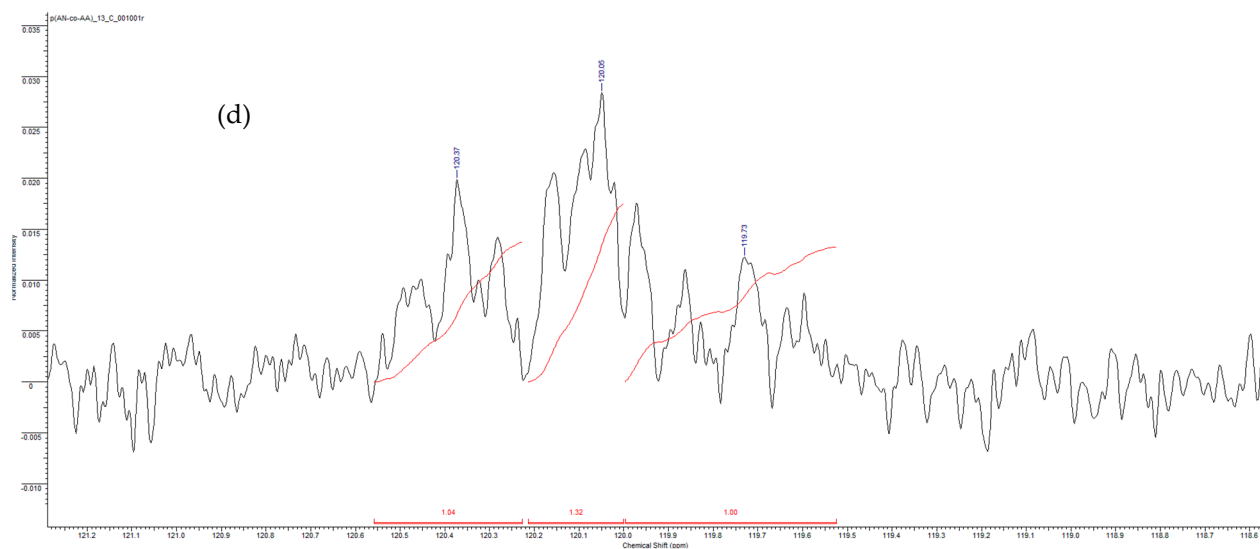

**Figure S3.** SEC traces of the copolymers formed in the experiments 4 – 7 (Table 1) at various conversions; Samples: 4 (a), 5 (b), 6 (c), and 7 (d).

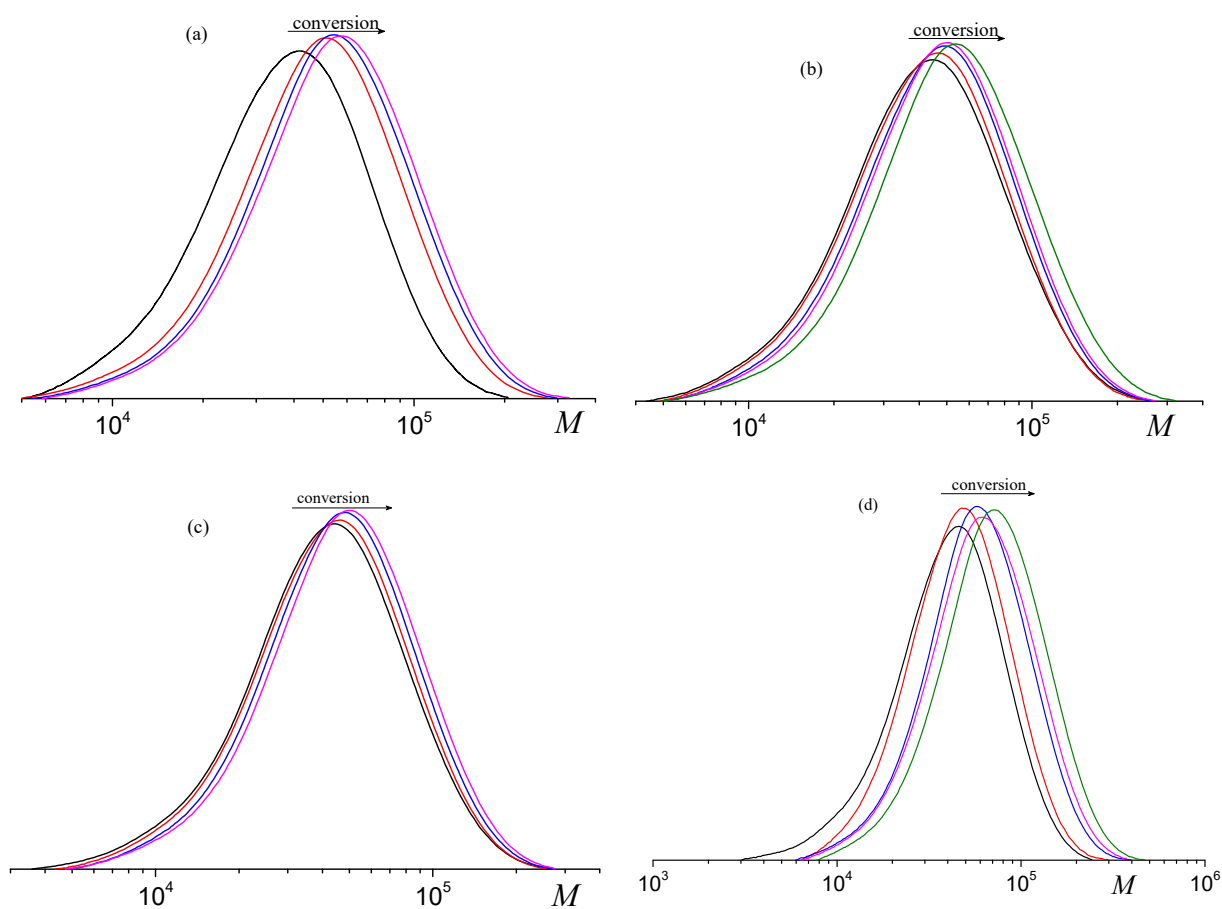

**Figure S4.** DCS thermograms of samples 1, 2, 4 – 6 registered in argon at different heating rates

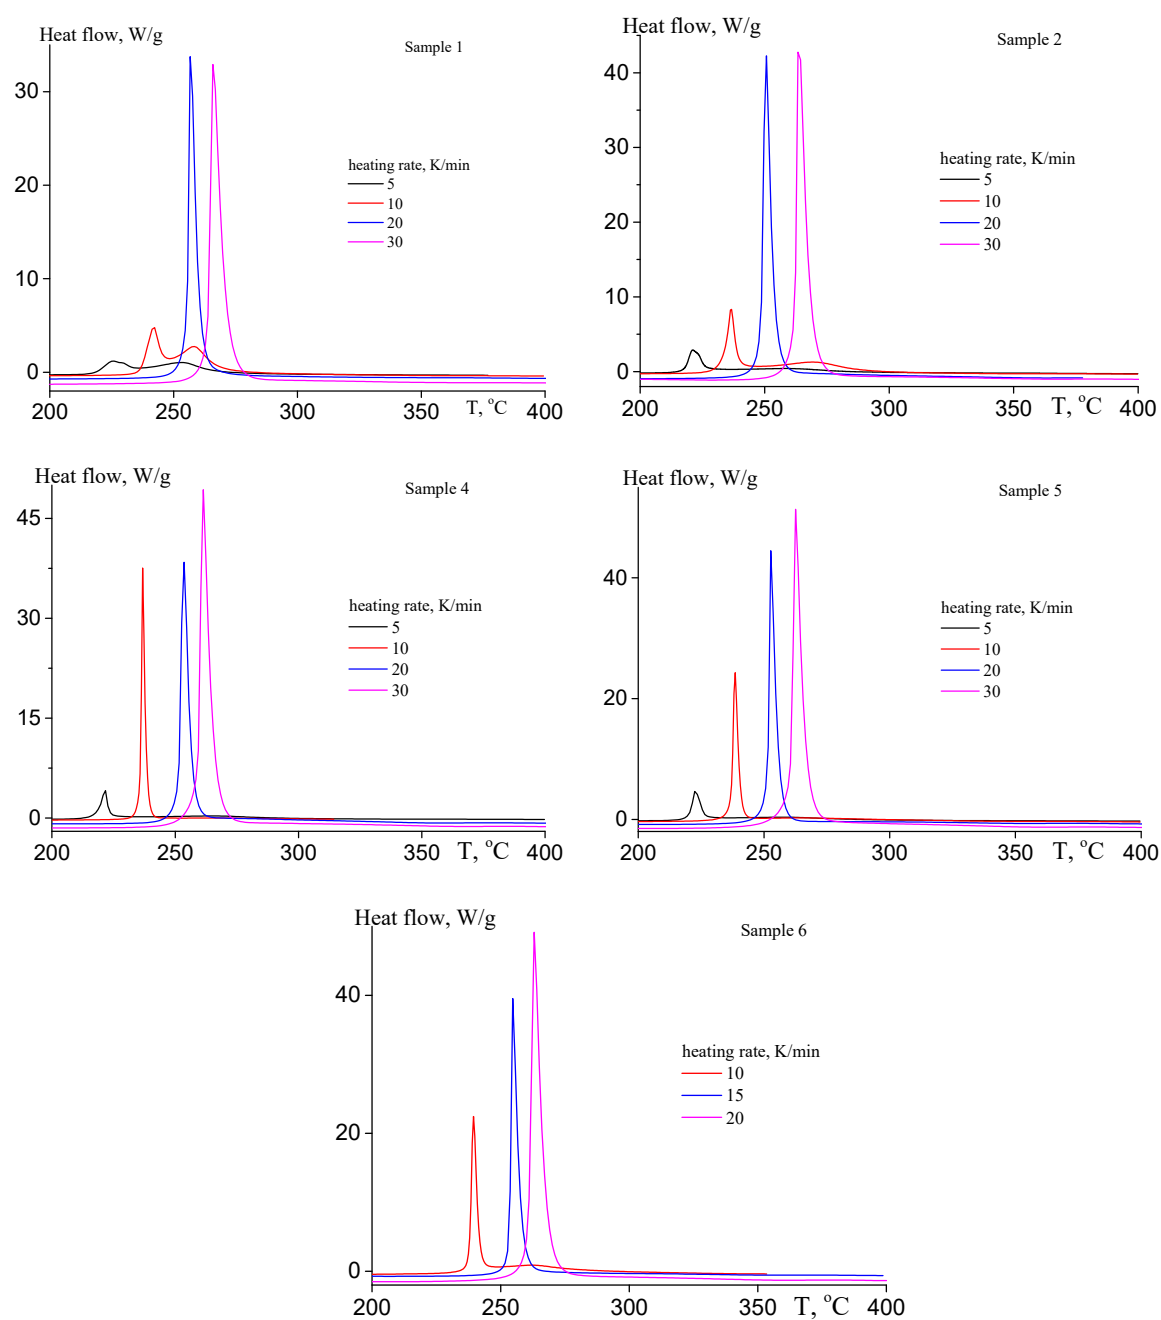

**Figure S5.** FTIR spectra of AN and AAM copolymers subjected to thermal treatment in Ar atmosphere at 200 °C for 0 (1), 5 (2), 10 (3) 20 (4), 60 (5), and 120 min (6)

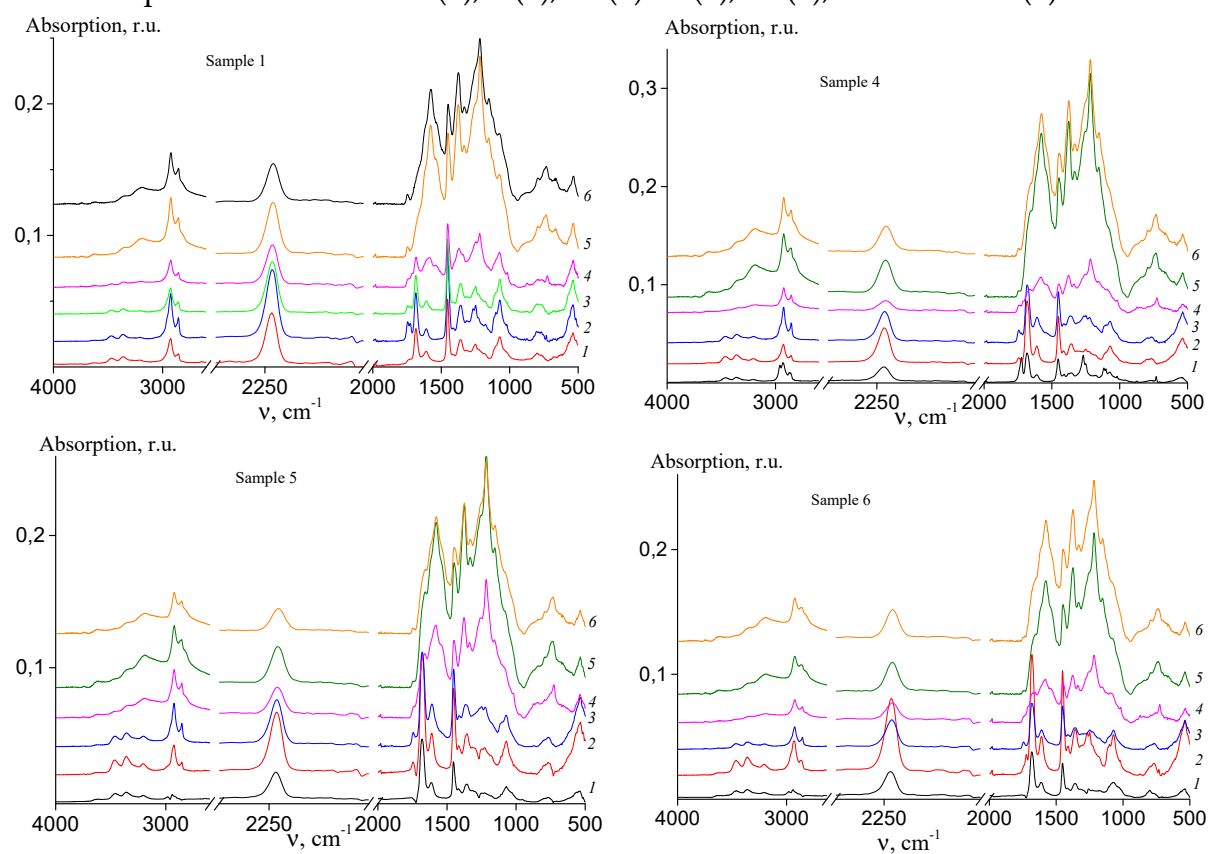



**Figure S6.** FTIR spectra of AN and AAM copolymers subjected to thermal treatment in Ar atmosphere at 225 °C for 0 (1), 7 (2), 30 (3) 60 (4), and 120 min (5)

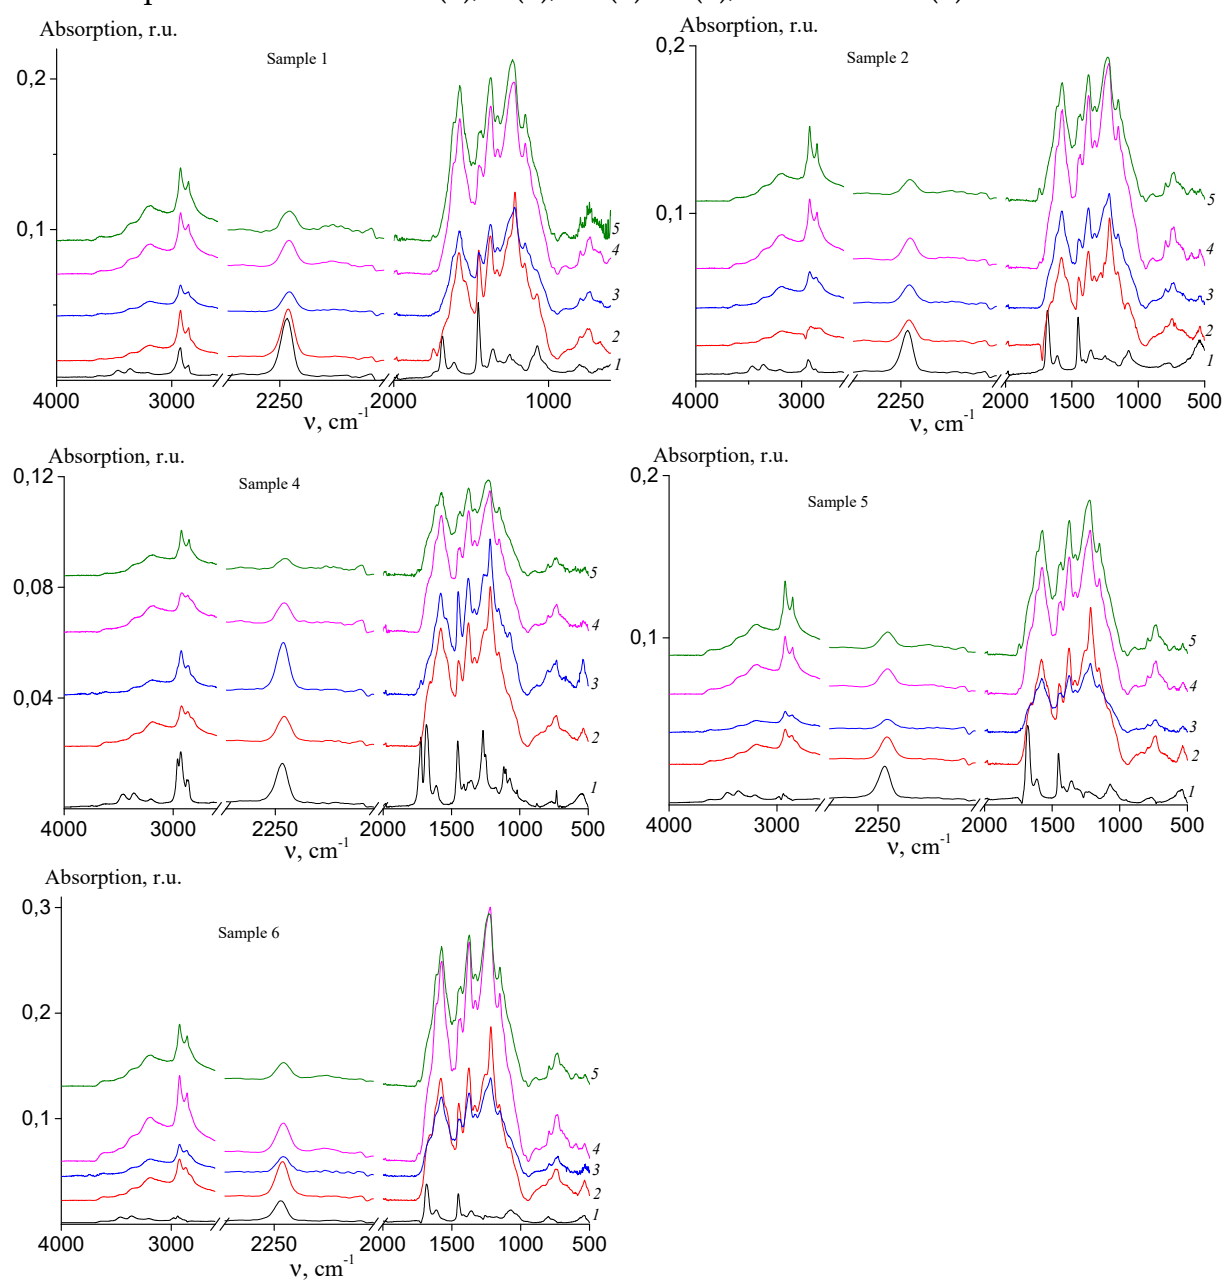

Supplement: s1 [file s1]
